# Supplementary material for: De novo Comparative Transcriptome Analysis of Genes Differentially Expressed in the Scion of Homografted and Heterografted Tomato Seedlings
Source: PubMed Central journal article supplement (PMC6934607; doi:10.1038/s41598-019-56563-z), 2019-12-27
Supplement: 41598_2019_56563_MOESM1_ESM.pdf [file 41598_2019_56563_MOESM1_ESM.pdf]

*De novo* Comparative Transcriptome Analysis of Genes Differentially  
Expressed in the Scion of Homografted and Heterografted Tomato  
Seedlings

Peng Zhou<sup>+</sup>·Hui Wang<sup>+</sup>·Wenying Zhu·Wenli Li·FuWang\*

College of Horticulture, Qingdao Agricultural University, Qingdao, 266109, China

<sup>+</sup>These authors have contributed equally to this work.

[\\*To whom correspondence should be addressed. E-mail: wangfuabcd@163.com](mailto:wangfuabcd@163.com)

Supplementary Table S1.KEGG pathway enrichment analysis detected between hetero- and homografted tomato seedlings

| Name                                        | Map      | Gene in DE                                                                                                                                                                                                                                                                                                                                                                                                                                                                                                                                                                                                                        | Up Gene                                                                                                                                                                                                                                                                                                                                                   | Up Count | Down Gene                                                                                                                                                                 | Down Count | total gene |
|---------------------------------------------|----------|-----------------------------------------------------------------------------------------------------------------------------------------------------------------------------------------------------------------------------------------------------------------------------------------------------------------------------------------------------------------------------------------------------------------------------------------------------------------------------------------------------------------------------------------------------------------------------------------------------------------------------------|-----------------------------------------------------------------------------------------------------------------------------------------------------------------------------------------------------------------------------------------------------------------------------------------------------------------------------------------------------------|----------|---------------------------------------------------------------------------------------------------------------------------------------------------------------------------|------------|------------|
| Protein processing in endoplasmic reticulum | map04141 | gene:Solyc01g0671202 K03347;gene:Solyc01g0795302 K10661;gene:Solyc03g1125902 K13525;gene:Solyc03g1235402 K13993;gene:Solyc04g014802 K13993;gene:Solyc05g0083902 K10661;gene:Solyc01g1023002 K12126;gene:Solyc06g0537102 K14509;gene:Solyc07g0146201 K14488;ene:Solyc07g0409902 K14497;gene:Solyc08g0769601 K14496;gene:Solyc08g0777802 K14498;ene:Solyc02g0709501 K08912;gene:Solyc02g0709701 K08912;gene:Solyc02g0709901 K08912;gene:Solyc02g0710001 K08912;ene:Solyc02g0710101 K08912;ene:Solyc06g0537102 K14509;gene:Solyc07g0409902 K14497;gene:Solyc08g0769601 K14496;ene:Solyc08g0777802 K14498;ene:Solyc08g0777802 K14498; | gene:Solyc01g067120.2 K03347;gene:Solyc01g079530.2 K10661;gene:Solyc03g112590.2 K13525;ene:Solyc03g123540.2 K13993;gene:Solyc04g014480.2 K13993;gene:Solyc05g008390.2 K10661;ene:Solyc01g102300.2 K12126;gene:Solyc06g053710.2 K14509;gene:Solyc07g014620.1 K14488;ene:Solyc07g040990.2 K14497;gene:Solyc08g076960.1 K14496;gene:Solyc08g077780.2 K14498; | 10       |                                                                                                                                                                           | 0          | 10         |
| Plant hormone signal transduction           | map04075 | ene:Solyc07g0409902 K14497;gene:Solyc08g0769601 K14496;gene:Solyc08g0777802 K14498;ene:Solyc02g0709501 K08912;gene:Solyc02g0709701 K08912;gene:Solyc02g0709901 K08912;ene:Solyc02g0710101 K08912;ene:Solyc06g0537102 K14509;gene:Solyc07g0409902 K14497;gene:Solyc08g0769601 K14496;ene:Solyc08g0777802 K14498;                                                                                                                                                                                                                                                                                                                   | ene:Solyc07g040990.2 K14488;ene:Solyc07g040990.2 K14497;gene:Solyc08g076960.1 K14496;ene:Solyc08g077780.2 K14498;                                                                                                                                                                                                                                         | 8        | gene:Solyc01g005440.2 K13464;gene:Solyc11g013310.1 K13946                                                                                                                 | 2          | 10         |
| Photosynthesis - antenna proteins           | map00196 | ene:Solyc02g0709901 K08912;ene:Solyc02g0710001 K08912;ene:Solyc02g0710101 K08912;ene:Solyc06g0537102 K14509;gene:Solyc07g0409902 K14497;gene:Solyc08g0769601 K14496;ene:Solyc08g0777802 K14498;ene:Solyc08g0777802 K14498;                                                                                                                                                                                                                                                                                                                                                                                                        | ene:Solyc02g07099801 K08912;ene:Solyc02g0709901 K08912;ene:Solyc02g0710101 K08912;ene:Solyc06g053710.2 K14509;ene:Solyc07g040990.2 K14497;ene:Solyc08g076960.1 K14496;ene:Solyc08g077780.2 K14498;                                                                                                                                                        | 0        | gene:Solyc02g070950.1 K08912;ene:Solyc02g070970.1 K08912;gene:Solyc02g07099801 K08912;ene:Solyc02g070990.1 K08912;ene:Solyc02g071000.1 K08912;ene:Solyc02g0710101 K08912; | 9          | 9          |
| MAPK signaling pathway - plant              | map04016 | ene:Solyc08g0777802 K14498;ene:Solyc08g0777802 K14498;ene:Solyc08g0777802 K14498;                                                                                                                                                                                                                                                                                                                                                                                                                                                                                                                                                 | ene:Solyc08g077780.2 K14498;ene:Solyc08g077780.2 K14498;                                                                                                                                                                                                                                                                                                  | 8        |                                                                                                                                                                           | 0          | 8          |



|                                |          |                                                                                                                                                                                                                                                                                                                                              |                                                                                                                                                                                                                                                                                                                                                          |   |   |   |
|--------------------------------|----------|----------------------------------------------------------------------------------------------------------------------------------------------------------------------------------------------------------------------------------------------------------------------------------------------------------------------------------------------|----------------------------------------------------------------------------------------------------------------------------------------------------------------------------------------------------------------------------------------------------------------------------------------------------------------------------------------------------------|---|---|---|
| Plant-pathogen interaction     | map04626 | gene:Solyc04g0181101 K13448;gene:Solyc05g0106702 K09487;gene:Solyc08g0816902 K13447;ene:Solyc09g0149902 K13424;gene:Solyc10g0794201 K13448;gene:Solyc11g0717401 K13448;gene:Solyc1g0671202 K03347;ene:Solyc04g0797002 K10260;gene:Solyc08g0679602 K10144;ene:Solyc10g0117402 K06689;gene:Solyc11g0051901 K10143;gene:Solyc10g0805701 K04506; | gene:Solyc04g018110.1 K13448;gene:Solyc05g010670.2 K09487;gene:Solyc08g081690.2 K13447;ene:Solyc09g014990.2 K13424;gene:Solyc10g079420.1 K13448;gene:Solyc11g0717401 K13448;gene:Solyc01g067120.2 K03347;ene:Solyc04g079700.2 K10260;gene:Solyc08g067960.2 K10144;ene:Solyc10g011740.2 K06689;gene:Solyc11g005190.1 K10143;gene:Solyc10g080570.1 K04506; | 6 | 0 | 6 |
| Ubiquitin mediated proteolysis | map04120 | ene:Solyc10g0117402 K06689;gene:Solyc11g0051901 K10143;gene:Solyc10g0805701 K04506;                                                                                                                                                                                                                                                          | ene:Solyc10g011740.2 K06689;gene:Solyc11g005190.1 K10143;gene:Solyc10g080570.1 K04506;                                                                                                                                                                                                                                                                   | 5 | 1 | 6 |
| Monoterpenoid biosynthesis     | map00902 | ene:Solyc09g0980302 K15099;gene:Solyc11g0714601 K15095;                                                                                                                                                                                                                                                                                      | ene:Solyc09g098030.2 K15099;gene:Solyc11g071460.1 K15095;                                                                                                                                                                                                                                                                                                | 0 | 5 | 5 |
| Circadian rhythm - plant       | map04712 | ene:Solyc08g0611302 K16241;gene:Solyc11g0051901 K10143;ene:Solyc12g0566501 K12124;gene:Solyc01g0053002 K12116;                                                                                                                                                                                                                               | ene:Solyc08g061130.2 K16241;gene:Solyc11g005190.1 K10143;ene:Solyc12g056650.1 K12124;gene:Solyc01g005300.2 K12116;                                                                                                                                                                                                                                       | 4 | 1 | 5 |

|                                            |          |                                                                                                                                              |                                                           |   |                                                                                                                     |   |   |
|--------------------------------------------|----------|----------------------------------------------------------------------------------------------------------------------------------------------|-----------------------------------------------------------|---|---------------------------------------------------------------------------------------------------------------------|---|---|
| beta-Alanine metabolism                    | map00410 | gene:Solyc06g0649002 K00128;gene:Solyc01g0940902 K05605;gene:Solyc03g0072402 K00797;gene:Solyc05g0057102 K00797;gene:Solyc07g0436802 K05605; | gene:Solyc06g064900.2 K00128                              | 1 | gene:Solyc01g094090.2 K05605;gene:Solyc03g007240.2 K00797;gene:Solyc05g005710.2 K00797;gene:Solyc07g043680.2 K05605 | 4 | 5 |
| Arginine and proline metabolism            | map00330 | gene:Solyc06g0649002 K00128;gene:Solyc01g0911702 K01476;gene:Solyc03g0072402 K00797;gene:Solyc05g0057102 K00797;gene:Solyc11g0715501 K01426; | gene:Solyc06g064900.2 K00128                              | 1 | gene:Solyc01g091170.2 K01476;gene:Solyc03g007240.2 K00797;gene:Solyc05g005710.2 K00797;gene:Solyc11g071550.1 K01426 | 4 | 5 |
| Valine, leucine and isoleucine degradation | map00280 | gene:Solyc05g0564802 K00166;gene:Solyc06g0649002 K00128;gene:Solyc01g0940902 K05605;gene:Solyc05g0531002 K00382;gene:Solyc07g0436802 K05605; | gene:Solyc05g056480.2 K00166;gene:Solyc06g064900.2 K00128 | 2 | gene:Solyc01g094090.2 K05605;gene:Solyc05g053100.2 K00382;gene:Solyc07g043680.2 K05605                              | 3 | 5 |
| Steroid biosynthesis                       | map00100 | gene:Solyc01g0081102 K05917;gene:Solyc01g0913202 K14423;gene:Solyc02g0694902 K09828;gene:Solyc09g0090402 K00222;                             |                                                           | 0 | gene:Solyc01g008110.2 K05917;gene:Solyc01g091320.2 K14423;gene:Solyc02g069490.2 K09828;gene:Solyc09g009040.2 K00222 | 4 | 4 |

|                       |          |                                                                                                                      |                                                           |   |                                                                                                                     |   |   |
|-----------------------|----------|----------------------------------------------------------------------------------------------------------------------|-----------------------------------------------------------|---|---------------------------------------------------------------------------------------------------------------------|---|---|
| Propanoate metabolism | map00640 | gene:Solyc05g056480.2 K00166;gene:Solyc01g094090.2 K05605;gene:Solyc05g053100.2 K00382;gene:Solyc07g043680.2 K05605; | gene:Solyc05g056480.2 K00166                              | 1 | gene:Solyc01g094090.2 K05605;gene:Solyc05g053100.2 K00382;gene:Solyc07g043680.2 K05605                              | 3 | 4 |
| Pyruvate metabolism   | map00620 | gene:Solyc06g064900.2 K00128;gene:Solyc07g062530.2 K01595;gene:Solyc05g053100.2 K00382;gene:Solyc11g007690.1 K00873; | gene:Solyc06g064900.2 K00128;gene:Solyc07g062530.2 K01595 | 2 | gene:Solyc05g053100.2 K00382;gene:Solyc11g007690.1 K00873                                                           | 2 | 4 |
| Ribosome              | map03010 | gene:Solyc01g103510.2 K02925;gene:Solyc03g097950.2 K02904;gene:Solyc12g098890.1 K02881;gene:Solyc12g100160.1 K02933; |                                                           | 0 | gene:Solyc01g103510.2 K02925;gene:Solyc03g097950.2 K02904;gene:Solyc12g098890.1 K02881;gene:Solyc12g100160.1 K02933 | 4 | 4 |
| Zeatin biosynthesis   | map00908 | gene:Solyc01g080150.2 K10760;gene:Solyc05g053400.1 K13492;gene:Solyc10g079350.1 K13492;gene:Solyc11g066670.1 K13492; | gene:Solyc01g080150.2 K10760                              | 1 | gene:Solyc05g053400.1 K13492;gene:Solyc10g079350.1 K13492;gene:Solyc11g066670.1 K13492                              | 3 | 4 |

|                                      |          |                                                                                      |                                                                                        |   |   |
|--------------------------------------|----------|--------------------------------------------------------------------------------------|----------------------------------------------------------------------------------------|---|---|
| Arginine biosynthesis                | map00220 | gene:Solyc01g0911702 K01476;gene:Solyc08g0769702 K01438;gene:Solyc08g0769802 K01438; | gene:Solyc01g091170.2 K01476;gene:Solyc08g076970.2 K01438;gene:Solyc08g076980.2 K01438 | 3 | 3 |
| Carotenoid biosynthesis              | map00906 | gene:Solyc01g1082102 K09843;gene:Solyc08g056102 K09843;gene:Solyc06g0846102 K17911;  | gene:Solyc01g108210.2 K09843;gene:Solyc08g05610.2 K09843                               | 1 | 3 |
| Porphyrin and chlorophyll metabolism | map00860 | gene:Solyc04g0768702 K02492;gene:Solyc06g0603102 K13600;gene:Solyc11g0128501 K13600; | gene:Solyc04g076870.2 K02492;gene:Solyc06g060310.2 K13600;gene:Solyc11g012850.1 K13600 | 3 | 3 |
| Galactose metabolism                 | map00052 | gene:Solyc01g0791702 K18819;gene:Solyc02g0865302 K06617;gene:Solyc07g0659802 K06617; | gene:Solyc01g079170.2 K18819;gene:Solyc02g086530.2 K06617;gene:Solyc07g065980.2 K06617 | 3 | 3 |

|                                                |          |                                                                                                                  |                                                                                                                    |     |   |   |
|------------------------------------------------|----------|------------------------------------------------------------------------------------------------------------------|--------------------------------------------------------------------------------------------------------------------|-----|---|---|
| Terpenoid backbone biosynthesis                | map00900 | gene:Solyc0<br>0g1365602 <br>K00806;gen<br>e:Solyc07g0<br>619902 K05<br>356;gene:So<br>lyc10g08514<br>01 K11778; | gene:Solyc0<br>0g136560.2 <br>K00806;gen<br>e:Solyc07g0<br>61990.2 K05<br>356;gene:So<br>lyc10g08514<br>0.1 K11778 | 3 . | 0 | 3 |
| 2-Oxocarboxylic acid metabolism                | map01210 | gene:Solyc0<br>9g0909002 <br>K01703;gen<br>e:Solyc08g0<br>769702 K01<br>438;gene:So<br>lyc08g07698<br>02 K01438; | gene:Solyc0<br>9g090900.2 <br>K01703                                                                               | 1   | 2 | 3 |
| Amino sugar and nucleotide<br>sugar metabolism | map00520 | gene:Solyc1<br>2g0102001 <br>K13648;gen<br>e:Solyc03g1<br>153801 K00<br>012;gene:So<br>lyc07g00509<br>02 K01183; | gene:Solyc1<br>2g010200.1 <br>K13648                                                                               | 1   | 2 | 3 |
| Cutin, suberine and wax<br>biosynthesis        | map00073 | gene:Solyc0<br>1g0959302 <br>K15406;gen<br>e:Solyc03g0<br>652502 K15<br>404;gene:So<br>lyc07g05389<br>02 K15406; | gene:Solyc0<br>1g095930.2 <br>K15406;gen<br>e:Solyc03g0<br>65250.2 K15<br>404;gene:So<br>lyc07g05389<br>0.2 K15406 | 3 . | 0 | 3 |



|                                         |          |                                                                                       |                                                           |   |                                                                                        |   |   |
|-----------------------------------------|----------|---------------------------------------------------------------------------------------|-----------------------------------------------------------|---|----------------------------------------------------------------------------------------|---|---|
| Cysteine and methionine metabolism      | map00270 | gene:Solyc07g0495302 K05933;gene:Solyc03g0072402 K00797;gene:Solyc05g00057102 K00797; | gene:Solyc07g049530.2 K05933                              | 1 | gene:Solyc03g007240.2 K00797;gene:Solyc05g005710.2 K00797                              | 2 | 3 |
| Glycolysis / Gluconeogenesis            | map00010 | gene:Solyc06g0649002 K00128;gene:Solyc05g0531002 K00382;gene:Solyc11g0076901 K00873;  | gene:Solyc06g064900.2 K00128                              | 1 | gene:Solyc05g053100.2 K00382;gene:Solyc11g007690.1 K00873                              | 2 | 3 |
| Glyoxylate and dicarboxylate metabolism | map00630 | gene:Solyc03g0342202 K01602;gene:Solyc05g0531002 K00382;gene:Solyc05g0558102 K01091;  | gene:Solyc03g034220.2 K01602                              | 0 | gene:Solyc03g034220.2 K01602;gene:Solyc05g053100.2 K00382;gene:Solyc05g055810.2 K01091 | 3 | 3 |
| Phenylpropanoid biosynthesis            | map00940 | gene:Solyc01g0103902 K01188;gene:Solyc02g0848002 K00430;gene:Solyc02g0925802 K00430;  | gene:Solyc01g010390.2 K01188;gene:Solyc02g084800.2 K00430 | 2 | gene:Solyc02g092580.2 K00430                                                           | 1 | 3 |

|                                             |          |                                                          |                              |                               |   |   |
|---------------------------------------------|----------|----------------------------------------------------------|------------------------------|-------------------------------|---|---|
| Nitrogen metabolism                         | map00910 | gene:Solyc02g0677902 K02575;gene:Solyc03g0834402 K00264; | gene:Solyc02g067790.2 K02575 | gene:Solyc013g083440.2 K00264 | 1 | 2 |
| ABC transporters                            | map02010 | gene:Solyc02g0874102 K05658;gene:Solyc03g0058602 K05658; | gene:Solyc02g087410.2 K05658 | gene:Solyc013g005860.2 K05658 | 1 | 2 |
| Alanine, aspartate and glutamate metabolism | map00250 | gene:Solyc07g0433102 K16871;gene:Solyc03g0834402 K00264; | gene:Solyc07g043310.2 K16871 | gene:Solyc013g083440.2 K00264 | 1 | 2 |
| alpha-Linolenic acid metabolism             | map00592 | gene:Solyc01g0065602 K00454;gene:Solyc11g0698001 K01723; | gene:Solyc01g006560.2 K00454 | gene:Solyc11g069800.1 K01723  | 1 | 2 |

|                                             |          |                                                            |                                                           |                               |   |   |
|---------------------------------------------|----------|------------------------------------------------------------|-----------------------------------------------------------|-------------------------------|---|---|
| Ascorbate and aldarate metabolism           | map00053 | gene:Solyc06g064900.2 K00128;gene:Solyc03g115380.1 K00012; | gene:Solyc06g064900.2 K00128                              | gene:Solyc013g115380.1 K00012 | 1 | 2 |
| Carbon fixation in photosynthetic organisms | map00710 | gene:Solyc07g062530.2 K01595;gene:Solyc03g034220.2 K01602; | gene:Solyc07g062530.2 K01595                              | gene:Solyc013g034220.2 K01602 | 1 | 2 |
| Diterpenoid biosynthesis                    | map00904 | gene:Solyc02g080120.1 K04125;gene:Solyc10g005360.2 K04125; | gene:Solyc02g080120.1 K04125;gene:Solyc10g005360.2 K04125 |                               | 2 | 0 |
| Fatty acid elongation                       | map00062 | gene:Solyc10g009240.2 K15397;gene:Solyc12g096780.1 K07512; | gene:Solyc10g009240.2 K15397                              | gene:Solyc112g096780.1 K07512 | 1 | 2 |

|                                    |          |                                                                                |                                                                               |   |   |
|------------------------------------|----------|--------------------------------------------------------------------------------|-------------------------------------------------------------------------------|---|---|
| Fatty acid metabolism              | map01212 | gene:Solyc1<br>2g009260.1 <br>K09458;gen<br>e:Solyc12g0<br>96780.1 K07<br>512; | gene:Solyc1<br>2g009260.1 <br>K09458;gen<br>e:Solyc12g0<br>96780.1 K07<br>512 | 2 | 2 |
| Glycerolipid metabolism            | map00561 | gene:Solyc0<br>6g064900.2 <br>K00128;gen<br>e:Solyc10g0<br>84900.1 K13<br>508; | gene:Solyc0<br>6g064900.2 <br>K00128                                          | 1 | 2 |
| Glycerophospholipid metabolism     | map00564 | gene:Solyc0<br>2g068430.2 <br>K00968;gen<br>e:Solyc10g0<br>84900.1 K13<br>508; | gene:Solyc0<br>2g068430.2 <br>K00968                                          | 1 | 2 |
| Isoquinoline alkaloid biosynthesis | map00950 | gene:Solyc0<br>2g078650.2 <br>K00422;gen<br>e:Solyc07g0<br>08380.1 K13<br>393; | gene:Solyc0<br>2g078650.2 <br>K00422                                          | 1 | 2 |

|                                          |          |                                                            |                                                           |                                                           |   |   |
|------------------------------------------|----------|------------------------------------------------------------|-----------------------------------------------------------|-----------------------------------------------------------|---|---|
| Linoleic acid metabolism                 | map00591 | gene:Solyc01g006560.2 K00454;gene:Solyc08g014000.2 K15718; | gene:Solyc01g006560.2 K00454                              | gene:Solyc01g006560.2 K15718                              | 1 | 2 |
| Pentose and glucuronate interconversions | map00040 | gene:Solyc01g091050.2 K01051;gene:Solyc03g115380.1 K00012; | gene:Solyc01g091050.2 K01051                              | gene:Solyc01g115380.1 K00012                              | 1 | 2 |
| Peroxisome                               | map04146 | gene:Solyc05g054320.2 K08726;gene:Solyc11g012990.1 K13348; | .                                                         | gene:Solyc05g054320.2 K08726;gene:Solyc11g012990.1 K13348 | 2 | 2 |
| Phagosome                                | map04145 | gene:Solyc04g007650.2 K00921;gene:Solyc05g056230.2 K08057; | gene:Solyc04g007650.2 K00921;gene:Solyc05g056230.2 K08057 | .                                                         | 0 | 2 |

|                                   |          |                                                          |                                                           |   |   |   |
|-----------------------------------|----------|----------------------------------------------------------|-----------------------------------------------------------|---|---|---|
| Photosynthesis                    | map00195 | gene:Solyc06g0829502 K02699;gene:Solyc10g0751601 K02639; | gene:Solyc06g082950.2 K02699;gene:Solyc10g075160.1 K02639 | 0 | 2 | 2 |
| Purine metabolism                 | map00230 | gene:Solyc02g0784002 K01466;gene:Solyc11g0076901 K00873; | gene:Solyc02g078400.2 K01466                              | 1 | 1 | 2 |
| Ribosome biogenesis in eukaryotes | map03008 | gene:Solyc01g1099902 K14573;gene:Solyc02g0896002 K14545; | gene:Solyc01g109990.2 K14573;gene:Solyc02g089600.2 K14545 | 2 | 0 | 2 |
| Starch and sucrose metabolism     | map00500 | gene:Solyc01g0103902 K01188;gene:Solyc07g0065002 K16055; | gene:Solyc01g010390.2 K01188;gene:Solyc07g006500.2 K16055 | 2 | 0 | 2 |

|                                                        |          |                                                          |                                                           |   |   |   |
|--------------------------------------------------------|----------|----------------------------------------------------------|-----------------------------------------------------------|---|---|---|
| Tropane, piperidine and pyridine alkaloid biosynthesis | map00960 | gene:Solyc06g0834702 K08081;gene:Solyc06g0839102 K12692; | gene:Solyc06g083470.2 K08081;gene:Solyc06g083910.2 K12692 | 0 | 2 | 2 |
| Tryptophan metabolism                                  | map00380 | gene:Solyc06g0649002 K00128;gene:Solyc11g0715501 K01426; | gene:Solyc06g064900.2 K00128                              | 1 | 1 | 2 |
| Tyrosine metabolism                                    | map00350 | gene:Solyc02g0786502 K00422;gene:Solyc12g0141001 K00451; | gene:Solyc02g078650.2 K00422;gene:Solyc12g014100.1 K00451 | 2 | 0 | 2 |
| Arachidonic acid metabolism                            | map00590 | gene:Solyc05g0543202 K08726;                             | gene:Solyc05g054320.2 K08726                              | 0 | 1 | 1 |

|                              |          |                                      |                                      |                                        |   |   |
|------------------------------|----------|--------------------------------------|--------------------------------------|----------------------------------------|---|---|
| Basal transcription factors  | map03022 | gene:Solyc0<br>7g0068202 <br>K03125; | gene:Solyc0<br>7g006820.2 <br>K03125 | 1 .                                    | 0 | 1 |
| Base excision repair         | map03410 | gene:Solyc1<br>0g0052102 <br>K01246; | gene:Solyc1<br>0g005210.2 <br>K01246 | 1 .                                    | 0 | 1 |
| Biotin metabolism            | map00780 | gene:Solyc1<br>2g0092601 <br>K09458; | .                                    | gene:Solyc1<br>0 2g009260.1 <br>K09458 | 1 | 1 |
| Brassinosteroid biosynthesis | map00905 | gene:Solyc1<br>0g0865001 <br>K09591; | .                                    | gene:Solyc1<br>0 0g086500.1 <br>K09591 | 1 | 1 |



|                                        |          |                                      |                                      |                                        |   |   |
|----------------------------------------|----------|--------------------------------------|--------------------------------------|----------------------------------------|---|---|
| Butanoate metabolism                   | map00650 | gene:Solyc0<br>7g0433102 <br>K16871; | gene:Solyc0<br>7g043310.2 <br>K16871 | 1 .                                    | 0 | 1 |
| C5-Branched dibasic acid<br>metabolism | map00660 | gene:Solyc0<br>9g0909002 <br>K01703; | gene:Solyc0<br>9g090900.2 <br>K01703 | 1 .                                    | 0 | 1 |
| Cholesterol metabolism                 | map04979 | gene:Solyc0<br>3g1132102 <br>K15040; | .                                    | gene:Solyc0<br>0 3g113210.2 <br>K15040 | 1 | 1 |
| Citrate cycle (TCA cycle)              | map00020 | gene:Solyc0<br>5g0531002 <br>K00382; | .                                    | gene:Solyc0<br>0 5g053100.2 <br>K00382 | 1 | 1 |

|                            |          |                                      |                                        |     |   |   |
|----------------------------|----------|--------------------------------------|----------------------------------------|-----|---|---|
| Cyanoamino acid metabolism | map00460 | gene:Solyc0<br>1g0103902 <br>K01188; | gene:Solyc0<br>1g010390.2 <br>K01188   | 1 . | 0 | 1 |
| DNA replication            | map03030 | gene:Solyc0<br>7g0183002 <br>K10739; | gene:Solyc0<br>0 7g018300.2 <br>K10739 | .   | 1 | 1 |
| Endocytosis                | map04144 | gene:Solyc1<br>1g0200401 <br>K03283; | gene:Solyc1<br>1g020040.1 <br>K03283   | 1 . | 0 | 1 |
| Fatty acid biosynthesis    | map00061 | gene:Solyc1<br>2g0092601 <br>K09458; | gene:Solyc1<br>0 2g009260.1 <br>K09458 | .   | 1 | 1 |

|                                             |          |                                      |                                      |                                        |   |   |
|---------------------------------------------|----------|--------------------------------------|--------------------------------------|----------------------------------------|---|---|
| Fatty acid degradation                      | map00071 | gene:Solyc0<br>6g0649002 <br>K00128; | gene:Solyc0<br>6g064900.2 <br>K00128 | 1 .                                    | 0 | 1 |
| Flavonoid biosynthesis                      | map00941 | gene:Solyc0<br>5g0098601 <br>K13081; |                                      | gene:Solyc0<br>0 5g009860.1 <br>K13081 | 1 | 1 |
| Glucosinolate biosynthesis                  | map00966 | gene:Solyc0<br>9g0909002 <br>K01703; | gene:Solyc0<br>9g090900.2 <br>K01703 | 1 .                                    | 0 | 1 |
| Glycine, serine and threonine<br>metabolism | map00260 | gene:Solyc0<br>5g0531002 <br>K00382; |                                      | gene:Solyc0<br>0 5g053100.2 <br>K00382 | 1 | 1 |

|                               |          |                                      |                                      |                                        |   |   |
|-------------------------------|----------|--------------------------------------|--------------------------------------|----------------------------------------|---|---|
| Histidine metabolism          | map00340 | gene:Solyc0<br>6g0649002 <br>K00128; | gene:Solyc0<br>6g064900.2 <br>K00128 | 1 .                                    | 0 | 1 |
| Homologous recombination      | map03440 | gene:Solyc0<br>7g0183002 <br>K10739; | .                                    | gene:Solyc0<br>0 7g018300.2 <br>K10739 | 1 | 1 |
| Inositol phosphate metabolism | map00562 | gene:Solyc0<br>4g0076502 <br>K00921; | gene:Solyc0<br>4g007650.2 <br>K00921 | 1 .                                    | 0 | 1 |
| Isoflavonoid biosynthesis     | map00943 | gene:Solyc0<br>4g0052302 <br>K13258; | .                                    | gene:Solyc0<br>0 4g005230.2 <br>K13258 | 1 | 1 |

|                            |          |                                      |                                        |     |   |   |
|----------------------------|----------|--------------------------------------|----------------------------------------|-----|---|---|
| Lysine degradation         | map00310 | gene:Solyc0<br>6g0649002 <br>K00128; | gene:Solyc0<br>6g064900.2 <br>K00128   | 1 . | 0 | 1 |
| Mismatch repair            | map03430 | gene:Solyc0<br>7g0183002 <br>K10739; | gene:Solyc0<br>0 7g018300.2 <br>K10739 | .   | 1 | 1 |
| Nucleotide excision repair | map03420 | gene:Solyc0<br>7g0183002 <br>K10739; | gene:Solyc0<br>0 7g018300.2 <br>K10739 | .   | 1 | 1 |
| Phenylalanine metabolism   | map00360 | gene:Solyc1<br>1g0715501 <br>K01426; | gene:Solyc1<br>0 1g071550.1 <br>K01426 | .   | 1 | 1 |

|                                               |          |                                      |                                      |                                        |   |   |
|-----------------------------------------------|----------|--------------------------------------|--------------------------------------|----------------------------------------|---|---|
| Phosphatidylinositol signaling system         | map04070 | gene:Solyc0<br>4g0076502 <br>K00921; | gene:Solyc0<br>4g007650.2 <br>K00921 | 1 .                                    | 0 | 1 |
| Phosphonate and phosphinate metabolism        | map00440 | gene:Solyc0<br>2g0684302 <br>K00968; | gene:Solyc0<br>2g068430.2 <br>K00968 | 1 .                                    | 0 | 1 |
| Riboflavin metabolism                         | map00740 | gene:Solyc0<br>3g0980102 <br>K14379; | .                                    | gene:Solyc0<br>0 3g098010.2 <br>K14379 | 1 | 1 |
| Sesquiterpenoid and triterpenoid biosynthesis | map00909 | gene:Solyc1<br>2g0065301 <br>K15813; | gene:Solyc1<br>2g006530.1 <br>K15813 | 1 .                                    | 0 | 1 |

|                                                     |          |                               |                              |   |   |
|-----------------------------------------------------|----------|-------------------------------|------------------------------|---|---|
| Ubiquinone and other terpenoid-quinone biosynthesis | map00130 | gene:Solyc07g017770.2 K09833; | gene:Solyc07g017770.2 K09833 | 1 | 1 |
| Valine, leucine and isoleucine biosynthesis         | map00290 | gene:Solyc09g090900.2 K01703; | gene:Solyc09g090900.2 K01703 | 1 | 0 |
| Vitamin B6 metabolism                               | map00750 | gene:Solyc03g121420.2 K13248; | gene:Solyc03g121420.2 K13248 | 1 | 1 |

Supplementary Table S2. Familial classification of transcription factors differentially expressed in the scion of heterografted tomato seedlings

| Gene              | Reference_Spe | Family  | Ref_Gene_Introduction                                           |
|-------------------|---------------|---------|-----------------------------------------------------------------|
| Solyc06g0755:down | Solanum_lycof | AP2     | related to AP2.7                                                |
| Solyc09g0072:down | Solanum_lycof | AP2     | related to AP2.7                                                |
| Solyc10g0843:down | Solanum_lycof | AP2     | related to AP2.7                                                |
| Solyc01g1023:up   | Solanum_lycof | bHLH    | phytochrome interacting factor 3                                |
| Solyc03g0978:up   | Solanum_lycof | bHLH    | basic helix-loop-helix (bHLH) DNA-binding superfamily protein   |
| Solyc03g1183:down | Solanum_lycof | bHLH    | basic helix-loop-helix (bHLH) DNA-binding superfamily protein   |
| Solyc03g1193:up   | Solanum_lycof | bHLH    | BR enhanced expression 3                                        |
| Solyc03g1212:up   | Solanum_lycof | bHLH    | basic helix-loop-helix (bHLH) DNA-binding superfamily protein   |
| Solyc09g0577:up   | Solanum_lycof | bHLH    | basic helix-loop-helix (bHLH) DNA-binding superfamily protein   |
| Solyc02g0619:up   | Solanum_lycof | bZIP    | basic region/leucine zipper motif 27                            |
| Solyc02g0629:up   | Solanum_lycof | bZIP    | G-box binding factor 1                                          |
| Solyc02g0920:up   | Solanum_lycof | bZIP    | basic leucine-zipper 6                                          |
| Solyc08g0611:up   | Solanum_lycof | bZIP    | Basic-leucine zipper (bZIP) transcription factor family protein |
| Solyc10g0540:up   | Solanum_lycof | bZIP    | basic leucine-zipper 44                                         |
| Solyc04g0085:up   | Solanum_lycof | C2H2    | indeterminate(ID)-domain 4                                      |
| Solyc04g0779:up   | Solanum_lycof | C2H2    | salt tolerance zinc finger                                      |
| Solyc05g0091:up   | Solanum_lycof | C2H2    | C2H2 and C2HC zinc fingers superfamily protein                  |
| Solyc08g0630:up   | Solanum_lycof | C2H2    | indeterminate(ID)-domain 11                                     |
| Solyc09g0075:up   | Solanum_lycof | C2H2    | C2H2-like zinc finger protein                                   |
| Solyc06g0630:up   | Solanum_lycof | C3H     | SAP domain-containing protein                                   |
| Solyc07g0451:up   | Solanum_lycof | CO-like | B-box type zinc finger protein with CCT domain                  |
| Solyc02g0786:up   | Solanum_lycof | Dof     | Dof-type zinc finger DNA-binding family protein                 |
| Solyc03g0935:up   | Solanum_lycof | ERF     | Integrase-type DNA-binding superfamily protein                  |
| Solyc03g0935:up   | Solanum_lycof | ERF     | Integrase-type DNA-binding superfamily protein                  |
| Solyc03g0935:up   | Solanum_lycof | ERF     | Integrase-type DNA-binding superfamily protein                  |
| Solyc04g0729:up   | Solanum_lycof | ERF     | related to AP2 4                                                |
| Solyc05g0520:up   | Solanum_lycof | ERF     | Integrase-type DNA-binding superfamily protein                  |
| Solyc05g0520:up   | Solanum_lycof | ERF     | Integrase-type DNA-binding superfamily protein                  |
| Solyc05g0520:up   | Solanum_lycof | ERF     | ethylene responsive element binding factor 1                    |
| Solyc08g0822:up   | Solanum_lycof | ERF     | Integrase-type DNA-binding superfamily protein                  |
| Solyc09g0899:up   | Solanum_lycof | ERF     | ethylene response factor 1                                      |



|                    |                         |                                                                                        |
|--------------------|-------------------------|----------------------------------------------------------------------------------------|
| Solyc08g0764(up)   | Solanum_lycof G2-like   | Homeodomain-like superfamily protein                                                   |
| Solyc12g0088:up    | Solanum_lycof GATA      | cytokinin-responsive gata factor 1                                                     |
| Solyc06g0831:up    | Solanum_lycof GeBP      | FKBP-like peptidyl-prolyl cis-trans isomerase family protein                           |
| Solyc01g1002(up)   | Solanum_lycof GRAS      | SCARECROW-like 14                                                                      |
| Solyc01g0739:up    | Solanum_lycof HD-ZIP    | homeobox from Arabidopsis thaliana                                                     |
| Solyc02g0802(down) | Solanum_lycof HD-ZIP    | protodermal factor 2                                                                   |
| Solyc02g0869:up    | Solanum_lycof HD-ZIP    | homeobox 1                                                                             |
| Solyc02g0919:up    | Solanum_lycof HD-ZIP    | Homeobox-leucine zipper protein family                                                 |
| Solyc04g0772:up    | Solanum_lycof HD-ZIP    | Homeobox-leucine zipper protein family                                                 |
| Solyc06g0359:down  | Solanum_lycof HD-ZIP    | Homeobox-leucine zipper family protein / lipid-binding START domain-containing protein |
| Solyc08g0783(up)   | Solanum_lycof HD-ZIP    | homeobox protein 2                                                                     |
| Solyc02g0908:up    | Solanum_lycof HSF       | heat shock factor 4                                                                    |
| Solyc06g0539(up)   | Solanum_lycof HSF       | heat shock transcription factor A6B                                                    |
| Solyc08g0629(up)   | Solanum_lycof HSF       | heat shock transcription factor A2                                                     |
| Solyc09g0656(up)   | Solanum_lycof HSF       | heat shock transcription factor A6B                                                    |
| Solyc03g1195:up    | Solanum_lycof LBD       | LOB domain-containing protein 41                                                       |
| Solyc01g1023:up    | Solanum_lycof MYB       | myb domain protein 61                                                                  |
| Solyc06g0716:up    | Solanum_lycof MYB       | myb domain protein 86                                                                  |
| Solyc06g0839(down) | Solanum_lycof MYB       | myb domain protein 13                                                                  |
| Solyc12g0493:up    | Solanum_lycof MYB       | myb domain protein 12                                                                  |
| Solyc01g0739:up    | Solanum_lycof MYB_relat | DNA-binding bromodomain-containing protein                                             |
| Solyc03g1136:up    | Solanum_lycof MYB_relat | Homeodomain-like superfamily protein                                                   |
| Solyc06g0756(up)   | Solanum_lycof MYB_relat | myb domain protein 48                                                                  |
| Solyc01g0098(up)   | Solanum_lycof NAC       | NAC domain containing protein 83                                                       |
| Solyc02g0934:up    | Solanum_lycof NAC       | NAC domain containing protein 44                                                       |
| Solyc04g0056:up    | Solanum_lycof NAC       | NAC-like, activated by AP3/PI                                                          |
| Solyc04g0799:up    | Solanum_lycof NAC       | NAC domain containing protein 38                                                       |
| Solyc05g0077:up    | Solanum_lycof NAC       | NAC-like, activated by AP3/PI                                                          |
| Solyc08g0086(up)   | Solanum_lycof NAC       | NAC (No Apical Meristem) domain transcriptional regulator superfamily protein          |
| Solyc10g0557(up)   | Solanum_lycof NAC       | NAC domain containing protein 36                                                       |
| Solyc04g0070(up)   | Solanum_lycof RAV       | related to ABI3/VP1 1                                                                  |
| Solyc05g0097:up    | Solanum_lycof RAV       | AP2/B3 transcription factor family protein                                             |
| Solyc02g0779:up    | Solanum_lycof SBP       | squamosa promoter binding protein-like 3                                               |
| Solyc01g0070:up    | Solanum_lycof TALE      | BEL1-like homeodomain 1                                                                |
| Solyc04g0772:up    | Solanum_lycof TALE      | KNOTTED-like from Arabidopsis thaliana                                                 |
| Solyc11g0698:up    | Solanum_lycof TALE      | BEL1-like homeodomain 8                                                                |
| Solyc03g0068(down) | Solanum_lycof TCP       | TCP family transcription factor                                                        |
| Solyc12g0141:down  | Solanum_lycof TCP       | TCP family transcription factor 4                                                      |
| Solyc12g0565:up    | Solanum_lycof Trihelix  | Duplicated homeodomain-like superfamily protein                                        |
| Solyc01g0792(up)   | Solanum_lycof WRKY      | WRKY DNA-binding protein 23                                                            |
| Solyc01g0956:up    | Solanum_lycof WRKY      | WRKY family transcription factor                                                       |
| Solyc02g0216:up    | Solanum_lycof WRKY      | WRKY DNA-binding protein 14                                                            |

|                   |                     |                                                          |
|-------------------|---------------------|----------------------------------------------------------|
| Solyc02g0721:up   | Solanum_lycof WRKY  | WRKY DNA-binding protein 65                              |
| Solyc03g0957:up   | Solanum_lycof WRKY  | WRKY DNA-binding protein 70                              |
| Solyc03g1168:up   | Solanum_lycof WRKY  | WRKY DNA-binding protein 40                              |
| Solyc04g0785:up   | Solanum_lycof WRKY  | WRKY DNA-binding protein 7                               |
| Solyc05g0557:up   | Solanum_lycof WRKY  | WRKY DNA-binding protein 26                              |
| Solyc06g0684:up   | Solanum_lycof WRKY  | WRKY DNA-binding protein 40                              |
| Solyc08g0673:up   | Solanum_lycof WRKY  | WRKY DNA-binding protein 40                              |
| Solyc09g0149:up   | Solanum_lycof WRKY  | WRKY DNA-binding protein 33                              |
| Solyc09g0157:up   | Solanum_lycof WRKY  | WRKY DNA-binding protein 70                              |
| <br>              |                     |                                                          |
| Solyc01g0910:down | Solanum_lycof YABBY | Plant-specific transcription factor YABBY family protein |
| <br>              |                     |                                                          |
| Solyc02g0851:up   | Solanum_lycof ZF-HD | homeobox protein 24                                      |
| Solyc03g1160:up   | Solanum_lycof ZF-HD | mini zinc finger                                         |

---

Supplementary table S3. Quantitative real-time PCR (RT-qPCR) validated primer sequences for selected differentially expressed genes detected between hetero- and homografted tomato seedlings

| No. | Gene                    | Log2FoldChange | Up/Down | Forward primer (5' - 3' ) | Reverse primer (5' -3' ) |
|-----|-------------------------|----------------|---------|---------------------------|--------------------------|
| 1   | <i>Solyc07g042230.1</i> | 5.23           | up      | GCGGCTAGAGCTTATGATGC      | TGTCTGGATGCCTTCACTTG     |
| 2   | <i>Solyc03g019820.2</i> | 2.90           | up      | ATCCAGATACGGGGTTAGGG      | CCCACAAGTGAACCAAGGT      |
| 3   | <i>Solyc04g007000.1</i> | 4.74           | up      | TATGATATCGCGGCACAGAG      | TCTTGGCATGTTGAAGTTG      |
| 4   | <i>Solyc10g084900.1</i> | -6.94          | down    | GCCACCCCTAGGATAATGGT      | GAACTCCGGTGGTCTAACA      |
| 5   | <i>Solyc12g096780.1</i> | -4.52          | down    | TCATCTATTGGCCCTCGTTC      | TGTTTTCCCATGCGCTTTTC     |
| 6   | <i>Solyc07g043680.2</i> | -4.32          | down    | GAGAAGGAAGGACCCAAACC      | CAGCCCTCATTCCCTCATAA     |
| 7   | <i>Solyc01g095930.2</i> | 3.93           | up      | TTGAAGGATTCCCAATCACC      | AGTTGCGTTTGTGGCATTTC     |
| 8   | <i>Solyc04g007000.1</i> | 4.74           | up      | TTCCAAAACAACACGCAGAG      | ATCGAAATCGCCACATTTTC     |
| 9   | <i>Solyc05g052040.1</i> | 2.87           | up      | GCAGCATTTAGGCTCAGAGG      | TCTCACCTTTTCCCACAAG      |
| 10  | <i>Solyc07g064600.2</i> | -4.19          | down    | CACCGGAAGCTTTTGTATG       | CCGGTACTGGCTAAGCAAAC     |
| 11  | <i>Solyc03g123540.2</i> | 3.13           | up      | CCGTGGACATTCTGGATACC      | CCAGCGTCTTCTCATCTTCC     |
| 12  | <i>Solyc06g009140.2</i> | 2.66           | up      | TATCCAGAGGCGTGGATACG      | TTCAGCAGCATCAATTCCTT     |
| 13  | <i>Solyc09g089530.2</i> | -5.04          | down    | GTGGCCAGAACTTATTGGTG      | TAACCAACCACAGGCATTGA     |
| 14  | <i>Solyc02g084800.2</i> | 2.11           | up      | TTGTGTGAGGCTCCATTTC       | TTGTGGGCATTCTTCTCC       |
| 15  | <i>Solyc04g071600.2</i> | 5.57           | up      | AGCACCATAGCCATCTCCAG      | ATGGAATGCAAATCCACCAG     |
| 16  | <i>Solyc01g081310.2</i> | 1.91           | up      | CCGGTTTTGGTTCATAATGG      | CCTGGCACACTTGTTCATC      |
| 17  | <i>Solyc03g115230.2</i> | 3.69           | up      | ACCTCTGCATATGGCTTTGG      | CAGGTGCTGGTACTGAGAA      |
| 18  | <i>Solyc06g005820.2</i> | -6.80          | down    | GAGGAAGCGGAATGATGATG      | CGCCATGAAGAAGACAACAA     |
| 19  | <i>actin</i>            |                |         | CAAACGAGAATTGCCTTGGT      | CTTAACATCCGCACCAACCT     |
